# Supplementary material for: Evolution of the TGF-β Signaling Pathway and Its Potential Role in the Ctenophore, Mnemiopsis leidyi
Source: PLoS One. 2011 Sep 8;6(9):e24152. doi: 10.1371/journal.pone.0024152 (PMC3169577; doi:10.1371/journal.pone.0024152)
Supplement: Text S1 — Amino acid alignment of TGF-β ligands. Shown here are only the mature peptide sequences for taxa shown in Table S1, which was used to generate the tree in Figure 2. They were aligned using Muscle, then corrected by hand. (NEX) [file pone.0024152.s002.nex]

#NEXUS
[!Created by MacVector on May 06 2011 at 15:48:07.]

BEGIN DATA;
	DIMENSIONS NTAX=118 NCHAR=127;
 	FORMAT MISSING=X GAP=- INTERLEAVE DATATYPE=PROTEIN;
MATRIX
Dre_gdnf       CLLKEIHLNV-TDLDLGY---RTKEELIFRYCSGPCHDAE--------TNYDKILNNLT- [47]
Xl_Gdnf        CVLREIHLNV-TDLGLGY---ETKEELKFRYCSGSCNNPE--------TTYDQILKNLT- [47]
Mm_gdnf        CVLTAIHLNV-TDLGLGY---ETKEELIFRYCSGSCESAE--------TMYDKILKNLS- [47]
Mmu_artemin    CRLRSQLVPV-SALGLGH---SSDELIRFRFCSGSCRRAR--------SPHDLSLASLL- [47]
Mm_neurt       CGLRELEVRV-SELGLGY---TSDETVLFRYCAGACEAAI--------RIYDLGLRRLR- [47]
Mmu_persephin  CRLWSLTLPV-AELGLGY---ASEEKVIFRYCAGSCPQEA-------RTQHSLVLARLR- [48]
Ml_Tgf1b       RQKVKFDLNL-VDIGWDS-WMLIPKMVDIGICQGTC------NDMTALILH-AMAKHKI- [50]
Ml_Tgf1a       CRRQDLWINF-DEIGWD--FVITPKDVNIGDCGGQC------LDADSNIPH-AVVKQLL- [49]
Aq_tgf         CSKSSLSIDKGQLAQILDIEIDFPETFDLNVCGGHCPGSKYINQFHSKITYLLLATSEV- [59]
Ml_Tgf4        CKLEPLYINF-RDLGWES-WVIAPPGLEVGSCSGYC------MREDISSNYNLLINNISR [52]
Ml_Tgf2        CTMMEFYVNF-TKLGWGS-KIIHPQIEKINQCAGQCPYPM--SHAIDHTTN-ALFRGAW- [54]
Ml_TGFbA       CCKKDHWITF-KEVGLDH-IILEPQAYNAGLCLGVCNEMW-----LEQFYH-SHIMSLS- [51]
Spu_lefty      CCRRRKYVDF-RDLSWTSRWIIEPAGFEAFDCYGPCHNLR--SRHIRDIFRLPFYGGSP- [56]
Sko_lefty      CCRRPKYISF-RNMEWTNRWIIEPRGYEAYECVGPCH-----------IRHSSQATDLI- [47]
Cs_lefty       CCRENRFVNF-RETKWSKHWILEPAGFNAYHCAGGCRSD--------------------- [38]
Dre_lefty      CCREQYFINF-RALTWTQYWIIEPSGYQAFRCKGGCRQPK-------------------- [39]
Dre_lefty2     CCREEHFINF-RELTWTQYWIIEPAGYQAFRCAGGCKQP---KRGFYGYGQ--------- [47]
Xl_lefty       CCREEYFINF-RELTWTQYWIIEPAGYNAFRCTGSCKQPK-----YPLSHY--------- [45]
Tad_9129       --------------------ILAPQNFEYNFCVGRCKFPL--TGRMNATNH-AIVQTLM- [36]
Ml_Bmp3        CRVRNLMVNF-NKIGLNS--VMAPLEFNAHICSGQCHLDH---EETPMTNH-AFIQNML- [52]
Ml_Tgf3        CGVRLLYLQFEKDMSIPS--IRAPQGVYVNYCSGSCPYLW---KTENPPLHTLILGQYA- [54]
Spu_actB       CCRQIFRVHF-LDLGW-D-WVISPRGFDANYCRGSCS-----NFNSPSLTHTSIMHTA-- [50]
Tad_58663      CHREDLVVDF-KDIGW-E-WIISPRSFNAYQCVGVCKYPL--GSNTNATLH-ATLRAMM- [53]
Cin_Tgfb2      CCLRELYIDFRRDLEW-N-WVRAPVGYKANFCAGACPYLW-----SMDTQH-ATILGLY- [51]
Sko_TGFb2      CCLRQLYIDFKKDLGW-T-WIHAPQGYNANYCGGACPYLW-----SQNTQH-TTILSLY- [51]
Dre_Tgfb1      CCMRKLYIDFRKDLGW-K-WIHKPKGYFANYCMGSCTYIW-----NAENKY-SQILALY- [51]
Bfl_Tgf        CCLRELYIDFQRDLGW-K-WIHAPKGYNANFCAGSCPYLW-----STDSQH-STIIGLY- [51]
Sja_TGFb1      CCVRQLYIDFRKDLGW-K-WIHEPKGYHANFCLGPCPYIW-----SLDTQY-SKVLALY- [51]
Dre_Tgfb3      CCVRKLYIDFRQDLGW-R-WIHEPKGYHANFCSGPCPYLR-----SADTTH-SSLLSLY- [51]
Dre_Tgfb2      RCLRSLYIDFKKDLGW-R-WIHEPKGYNANFCAGACPYLW-----SADTQH-SNILGLY- [51]
Xl_Tgfb2       CCLRPLYIDFKKDLGW-K-WIHEPKGYNANFCAGACPYLW-----SSDTQH-SRVLSLY- [51]
Ml_Bmp58       CQRKELFIDF-SRLGWS--WIIGPPGFDAFMCSGECTLTF--NNKMQITNH-AYLQAFL- [53]
Tca_actl       CCRESFYVSF-ADIGWDD-WIMSPAGYDAYFCKGSCVTAS--ALTLSATQHNSILQKVM- [55]
Tad_9164       ----------------ND-IIFAPKVFESYYCSGTCSYPL--GPHLNATNH-AIVMAIL- [39]
Xl_Xnr2        CRRVDMIVDF-EKIEWGD-RIVYPKRFNAYRCEGACPIPL--NETFKPTNH-AYIKSLV- [54]
Xl_Xnr6        CRRVDMIVDF-DKIGWGH-HIIYPKRFNAFRCEGSCPIPL--NESFKPTNH-AYIKSLV- [54]
Spu_nod        CRRIDMDVDF-GRIGWDE-WIIYPKQFNAYRCVGTCKGPL--DSRDNPSNH-AVMQDLV- [54]
Sko_nodalC     CEKSDLMIDF-EKIGWSA-WVIFPKTFNAFQCVGSCSSRA--DG--NPTNH-AIIQGMV- [52]
Sko_nodalA     CERVELIVDF-DKIGWGS-WIIFPKKFDAYQCVGSCPGPV--DGEHNPNNH-AIIQNMV- [54]
Sko_nodalB     CRREGLTVDF-DKIGWGS-WIIHPKKFNAYQCVGSCPGPV--DGDHNPNNH-AIIQSML- [54]
Aca_nodl       CQIYDFEVDF-NAIGWGQ-WIIHPKRFNSRFCFGQCPSPI--DVKYKPTNH-AMLQTLM- [54]
Bgl_nod        CQLHNFEVDF-NTIGWGQ-WIIHPKKYNAQFCFGVCPSPV--DSKYKPTNH-AMLQTLM- [54]
Lgi_nodal      CQLHDFEVDF-NSIGWGQ-WIIHPKKFNARFCYGECASPI--DVKYKPTNH-AMLQTLM- [54]
Bfl_nodr       CKKVEFWVDF-DHIGWGT-WIIYPKRFNAFRCEGVCPTPV--DQLYHPTSH-AVMTSIL- [54]
Hro_nod        CRKVAFEVDF-DKIGWGE-WIIYPRRYNAFRCEGTCNVAM--MQQKTSTNH-AYVQSMF- [54]
Ame_admp       CSRHELYVDF-KEIGLSS-SIIAPLGYSAFHCKGICESPL--SQDQQPTNH-ATIQGIV- [54]
Cin_admp       CRRYPLYVDF-EEMGWSG-WIIHPQGYNAYHCRGKCSFPI--SQNLKPSNH-ATVQSIM- [54]
Bfl_80287      CTRRNLYVDF-DAIGWSG-WIISPKGYNAYHCKGKCPFPL--GQSQKPTNH-ATVQSIM- [54]
Xl_admp2       CQRRPLYVDF-EEIGWAG-WIISPKGYNAYHCKGTCLFPL--GQGLGATNH-ATVQSIV- [54]
Sko_admp       CSKQKLYVDF-EEIGWSG-WIISPRGYNAYHCKGECPFPL--GQTSKPTNH-ATVQSIV- [54]
Xl_Admp1       CQRHPLYVDF-EEIGWSG-WIISPRGYNAYHCKGSCPFPL--GQNMRPTNH-ATVQSII- [54]
Dre_admp       CQRQPLYVDF-EEIGWSG-WIVSPKGYNAYHCKGSCIFPL--SQNMRPTNH-AIVQSII- [54]
Spu_bmp3       CDRHSMNVDF-QAIGWDD-YVIAPATFQAFYCAGQCAFPI--QKELHPSNH-ALIQSIM- [54]
Sko_bmp3       CGRHVMRVDF-QLIGWNA-YVISPKSFDAFYCSGECPFPM--TKELNPSNH-AAVQSIV- [54]
Bfl_Bmp3       -----MRVDF-ADIGWSD-WIISPKAFDAYYCAGTCDFPM--SKVMKPSNH-ATIQSIM- [49]
Dre_bmp3       CARRYLKVDF-ADIGWSE-WIISPKSFDAYYCSGSCQFPM--PKSLKPSNH-ATIQSIV- [54]
Mm_bmp3        CARRYLKVDF-ADIGWSE-WIISPKSFDAFYCSGACQFPM--PKSLKPSNH-ATIQSIV- [54]
Xl_Bmp3        CSRRYLKVDF-ADIGWSE-WIISPKSFDAYYCSGACEFPM--AKVVRPSNH-ATIQSIV- [54]
Mm_gdf10       CSRRYLKVDF-ADIGWNE-WIISPKSFDAYYCAGACEFPM--PKIVRPSNH-ATIQSIV- [54]
Nve_1639178    CRRHRLFVKF-QELNWSD-WILAPRGFSAYYCTGTCPEVI--EQYFNPTNH-AIIQNLL- [54]
Cgi_gdf3       CRRRPMTVNF-ADIQWDS-WILAPSSYEAYECVGKCHFPV--NERLSPS----------- [45]
Tca_bmp10      CRRKPLYINF-SEINFDL-WILQPPGYEAYQCQGKCFYPV--AEHLNPTKH-AIVQALL- [54]
Mm_gdf2        CQKTSLRVNF-EDIGWDS-WIIAPKEYDAYECKGGCFFPL--ADDVTPTKH-AIVQTLV- [54]
Dre_Bmp10      CKKSSLYVDF-KDIGWDS-WILAPTGYEAFECTGVCTYPL--TKDVTPTKH-AVIQTLV- [54]
Mm_bmp10       CKKTPLYIDF-KEIGWDS-WIIAPPGYEAYECRGVCNYPL--AEHLTPTKH-AIIQALV- [54]
Cel_cet1       CRRTDFYVDF-DDLNWQD-WIMAPKGYDAYQCQGSCPNPM--PAQLNATNH-AIIQSLL- [54]
Tad_57057      CKRHKLKVNF-AAVGWND-WIIAPKDYDAYLCKGRCKFPL--SQHMNATNH-AIIQTVA- [54]
Mm_gdf3        CHRHQLFINF-QDLGWHK-WVIAPKGFMANYCHGECPFSM--TTYLNSSNY-AFMQALM- [54]
Nv_gdf5        CRRKRMYVDF-RLLGWSD-WIIAPQGYDAYLCEGECKYPI--DNYLRPTNH-ATVQTIV- [54]
Bfl99205       CMRRSLQVSF-HDLGWDD-WIIAPTNYDAHYCAGACSFPL--RSHLEPTNH-AIVQTLV- [54]
Dre_con        CNRKQLHVNF-KEMGWDD-WIIAPLEYEAFHCDGVCDFPI--RSHLEPTNH-AIIQTLM- [54]
Xl_Gdf5        CSKKPLHVNF-KDMGWDD-WIIAPLEYEAYHCEGLCEFPL--RSHLEPTNH-AVIQTLM- [54]
Dre_gdf6       CSKKPLHVNF-RELGWDD-WVIAPLDYEAYHCEGMCDFPL--RSHLEPTNH-AIIQTLM- [54]
Xl_Gdf6        CSKKPLHVNF-KELGWDD-WIIAPLEYEAHHCEGVCDFPL--RSHLEPTNH-AIIQTLM- [54]
Dre_gdf7       CSRKPLHVNF-KELGWDD-WIIAPLDYEAYHCEGLCDFPL--RSHLEPTNH-AIIQTLM- [54]
Nv_Bmp24       CQRHPLYVDF-TDVGWND-WIVAPPGYHAFYCTGVCPYPI--AKHLNATNH-AIVQTIM- [54]
Bmi_dpp        CQRRPLFVDF-AEVGWSD-WIVAPPGYEAYFCQGDCPFPL--ADHLNGTNH-AIVQTLV- [54]
Pdu_dpp        CRRHPLYVDF-SDVGWDD-WIVAPPGYRAYFCNGECGFPL--PEYINATNH-AIVQTLV- [54]
Ami_dpp        CQRHPLYVDF-SEVGWND-WIVAPPGYQGFYCKGECPFPI--ADHLNTTNH-AIVQTLM- [54]
Tsp_Tgh3       CQRHELYVDF-ESVGWND-WIVAPPGYKAYYCQGDCPFPL--NDHLNATNH-AIVQTLV- [54]
Lj_Bmp24       CARYPLYVDF-SDVGWND-WIVAPPGYNAFFCQGECHFPL--PQHLNSTNH-AIVQTLV- [54]
Sko_Bmp24      CKRHELYVDF-NDVGWND-WIVAPPGYHAFYCHGECPFPI--AEHLNSTNH-AIVQTLV- [54]
Spu_Bmp24      CRRHELYVDF-SDVHWND-WIVAPAGYQAYYCRGECPFPL--AEHLNTTNH-AIVQTLV- [54]
Bfl_Bmp24      CRRHSLYVDF-SDVGWND-WIVAPPGYQAYYCHGECPFPL--ADHLNSTNH-AIVQTLV- [54]
Xl_Bmp2        CRRHPLYVDF-SDVGWND-WIVAPPGYHAFYCHGECPFPL--ADHLNSTNH-AIVQTLV- [54]
Sko_univinlike CKRHPLYVNF-REVGWHD-WIIAPAGYEAFYCHGDCPFPL--NENLNGTNH-AIIQTLV- [54]
Spu_uni        CQRHRLFVSF-RDVGWEN-WIIAPMGYQAYYCDGECPFPL--GERLNGTNH-AIIQTLV- [54]
Bfl_Vg1        CKRRKLYIRF-KDVGWDD-WIIAPQGYMAYHCSGECPFPL--NEHLNGTNH-AVIQTLV- [54]
Dre_Dvr1       CKPRRLYIDF-KDVGWQD-WIIAPQGYLANYCHGECPFPL--SESLNGTNH-AILQTLV- [54]
Xl_Vg1         CKKRRLYVEF-KDVGWQN-WVIAPQGYMANYCYGECPYPL--TEILNGSNH-AILQTLV- [54]
Xl_der         CKKRRLYIDF-KDVGWQN-WVIAPRGYMANYCHGECPYPL--TEMLRGTNH-AVLQTLV- [54]
Pca_Bmp58      CGRHPLYIAF-KDLGWSD-WIIAPEGYKAAYCGGECKFPL--HENMNASNH-AIIQTLV- [54]
Hm_Bmp58       CDKHPLYIGF-KDLGWSD-WIIAPDGYRANYCGGDCSFPL--DNNANATNH-AIIQTLV- [54]
Spu_Bmp58      CKRKNLFVNF-EDLDWQE-WIIAPLGYVAFYCQGECAFPL--NGHANATNH-AIVQTLV- [54]
Nv_Bmp58       CQRQALHVSF-RKLRWQD-WVIAPEGYSAFYCSGECSFPL--NANMNATNH-AIVQTLV- [54]
Sko_Bmp58      CKKRSLVVSF-RELGWQD-WIIAPDGYSAFYCNGECSFPL--NAHMNATNH-AIVQTLV- [54]
Xl_Bmp7        CKKHELYVSF-KDLGWQD-WIIAPEGYAAFYCEGECAFPL--NSYMNATNH-AIVQTLV- [54]
Dre_Bmp6       CRKHDLYVSF-RELSWQD-WIIAPEGYAANYCDGECSFPL--NAHMNATNH-AIVQTLV- [54]
Mm_Bmp6        CKKHELYVSF-QDLGWQD-WIIAPKGYAANYCDGECSFPL--NAHMNATNH-AIVQTLV- [54]
Ml_TGFbB       CCRYHYFVKF-ADLGM-D-WILAPDGYDAYYCSGDCPFMY--LAEQKSSLYYTFVIARA- [54]
Tad_57877      CCVEEFYINF-KEIGWSD-WIISPQGYTANYCRGTCFGMD------SFGYRLKILQKLS- [51]
Ame_act        CCKQRFYVNF-SQLGWDD-WIIAPQGYYANYCRGDCAAGH-RTPDTFLNYYTHVIEEYR- [56]
Dme_act        CCKESFYVSF-KALGWDD-WIIAPRGYFANYCRGDCTGSF-RTPDTFQTFHAHFIEEYR- [56]
Mm_InhBe       CCRRDHYVDF-QELGWRD-WILQPEGYQLNYCSGQCPPHLAGSPGIAASFH-SAVFSLL- [56]
Mm_actBc       CCRQEFFVDF-REIGWND-WIIQPEGYAMNFCTGQCPLHVAGMPGISASFH-TAVLNLL- [56]
Xl_actD        CCRKDYYVDF-KDIGWND-WIIKPEGYQINYCMGLCPMHIAGAPGMAASFH-TTVLNLI- [56]
Dre_inhBb      CCKRQFYVNF-KDIGWSD-WIIAPSGYHANYCEGDCPSHVASITGSALSFHSTVINHYR- [57]
Dre_actBb      CCRQQFYIDF-RLIGWND-WIIAPAGYYGNYCEGSCPAYMAGVPGSASSFHTAVVNQYR- [57]
Spu_gdf11      CCKYPLVVDF-QQFGW-D-WIIAPRTYDANYCSGSCP-----DHYFYRYPHTQLISQMD- [51]
Nv_mst         CCRYELTVDF-EKFSW-N-WIIAPKRFRAYYCTGECQEIM-----LPMYPHAHMVKKST- [51]
Bfl_Mstn       CCRYPLQVDF-REFGW-D-WIIAPNTYQAYYCAGDCPPIF-----LQKYPHTHLVQQVN- [51]
Tca_myo        CCRYPLTVDF-EEFGW-D-FIIAPKRYDAHYCSGECPYVT-----LQKYPHTHLMKMAS- [51]
Mm_mst         CCRYPLTVDF-EAFGW-D-WIIAPKGYKANYCSGECEFVF-----LQKYPHTHLVHQAN- [51]
Dre_mstn2      CCRYPLTVDF-EDFGW-D-WIIAPKRYKANYCSGEC---------VQKYPHSHIVNKAN- [47]
Dre_mstn       CCRYPLTVDF-EDFGW-D-WIIAPKRYKANYCSGECDYMY-----LQKYPHTHLVNKAS- [51]
Nv_act         CCRQEFYVSF-EEMGWDN-WILVPRGFNANYCTGSCYGHI-----LPVYHHTEVIQKVA- [52]
Sko_activin    CCRKSFYVSF-EDIHWND-WIIEPSGFYANHCNGSCEGNT-----LPRYQHTTMMQRVSR [53]
Bfl244225      CCREKFYVDF-KDIAWDD-WIISPKGYYANFCTGSCQGTI-----LPRYHHTSVLQRVA- [52]

Dre_gdnf       ----HNKK--LDKDT-PSRTC--CRPIAFDD-DISFL------DD---SLEYH-TLKKHS [87]
Xl_Gdnf        -IRKKLVN--DKVKQ----AC--CRPIAFDD-DLSFL------DD---NLVYH-TLKQHS [87]
Mm_gdnf        ---RSRRL--TSDKV-GQ-AC--CRPVAFDD-DLSFL------DD---NLVYH-ILRKHS [87]
Mmu_artemin    --DAGALRSPPGSRPISQ-PC--CRPTRYEAVSFMDV-----------NSTWR-TVDHLS [90]
Mm_neurt       ----QRRRVRRERAR-AH-PC--CRPTAYED-EVSFL------DV---HSRYH-TLQELS [88]
Mmu_persephin  ----------GRGRAHGR-PC--CQPTSYADVTFL--------DD---QHHWQ-QLPQLS [83]
Ml_Tgf1b       ----SQVM--PNERI-GQ-IC--CQEASYREIVALYQ-----VDG---SLVKS-ILPQFV [91]
Ml_Tgf1a       ----QKMH--PARNA-GI-LC--CQGANYKEISALYF----KSKH---EIVIG-DMPKII [91]
Aq_tgf         ---EHLAN--KHHYS----KT--CVPTKYHSLNYIKF----DQNG---SVIKT--LDQFS [99]
Ml_Tgf4        DPELYRLY--GLAGI-RTERT--CVPTSFLPTVLMFI----GKDQ---DIVVQ-LVDDIL [99]
Ml_Tgf2        ----SKQF--PG-SV-AR-PC--CVPAEYKPATLMLM-----QGP---VTILK-IFDDLI [94]
Ml_TGFbA       ----DNVQ--------AR-NC--CAPASVDSLRIIYY---DEEND---THKFE-TLPNMQ [89]
Spu_lefty      ----SGL---PSRSG-GH-RT--CGVSRSSALPMMYLSATESGAV---ELKVE-EIPNMI [101]
Sko_lefty      -------N---------------CGVSKSSPLPMMYL-IQKGDIT---QVEVS-EIPNMV [80]
Cs_lefty       ----RRRN--SKGAP----RS--CSATETNSLPIMYL-VKKGGAI---HVEVS-EFPNMV [81]
Dre_lefty      ----RNYG--YGERK--------CAVVESAPLPMMYL-VKKGDYT---EIEVA-EFPNMI [80]
Dre_lefty2     -------------RT--------CAVMESAPLPMMYL-VKKGDYT---EIEVA-EFPNMI [81]
Xl_lefty       ----HYGQ-----------RT--CAVVESAPLPVMYL-VKKGDYT---EIEVA-EFPNMI [83]
Tad_9129       -----FVK--KAGNV-PN-AC--CAPISFSKLRVISR----NEDG---TFEMR-HMRDIV [77]
Ml_Bmp3        ----YLSG--TGEEV-QG-AS--CVSDKMKPLSVLIA-----AGR---DFQLT-VYEDMV [93]
Ml_Tgf3        ----EQIR--ESRYE----PC--CLPATYEAAEAITV-------E---NQIIK--FEDLR [90]
Spu_actB       ----REKN--PNFNI-PR-PC--CTPRSTGTLSMIYI----NEDG---QFYTV-DMPEMR [92]
Tad_58663      ----SYFGQNSQ----PTLPC--CTPDRLRSHTFLFY----NANH---EIQIN-EFDGMV [95]
Cin_Tgfb2      ----KSMN--PHASS-A--PC--CTPKELDPLILMYY-----ANN---EFKFT-KMSDMV [91]
Sko_TGFb2      ----QSLN--PDASA--V-PC--CVPKTLESLTILYY-----ESR---KPKIT-QLTNMV [91]
Dre_Tgfb1      ----KHHN--PGASA-Q--PC--CVPAILDPLPILYY-----VGR---QHKVE-QLSNMV [91]
Bfl_Tgf        ----STLN--PHASA-S--PC--CVPSELEPLTILYY-----QGR---KPRIE-QLSSMV [91]
Sja_TGFb1      ----NQHN--PGASA-A--PC--CVPQALEPLPIVYY-----VGR---KPKVE-QLSNMI [91]
Dre_Tgfb3      ----NTLN--PEASA-S--PC--CVPQDLEPLTILYY-----VGR---TPKVE-QLSNMI [91]
Dre_Tgfb2      ----NTIN--PEASA-S--PC--CVSQDLEPLTILYY-----IGK---TPKIE-QLSNMI [91]
Xl_Tgfb2       ----NTIN--PEASA-S--PC--CVSQDLDSLTILYY-----IGN---KPKIE-QLSNMI [91]
Ml_Bmp58       ----ESKH---K-NI-PK-PC--CSPRKLSPMTLIYY-----TEN---GIKMK-AYEEMR [92]
Tca_actl       ----YGQNKNRGSRP-ELTPC--CAATQFQPLQLVYM----DNNK---TMMTK-VLSNMI [100]
Tad_9164       ----HDLK--VQ-GV-KA-SQ--CAPTQLSPLSFLYV-----EGN---KIIIK-EYPDIV [79]
Xl_Xnr2        ----KLYD--QE-KV----ECSSCVPVKMSPLSMLLY-----EDG---EVVLK-HHEDMI [94]
Xl_Xnr6        ----KLYD--SD-RV----ECNSCVPVKMSPLSMLMY-----EDN---EVVLK-HHEDMI [94]
Spu_nod        ----RLHQ--PERRT-PE-PC--CVPTILRPLSMLYF-----EEG---AVLVR-HHENMI [95]
Sko_nodalC     ----RKVS--SN-HV-PT-PS--CVPVKLSPLSMIYY-----ERG---NIVVK-EHEDMI [92]
Sko_nodalA     ----HTSN--PD-RV-PL-PC--CVPTKLSSLSMLYY-----ERG---NIVVK-EHEGMV [94]
Sko_nodalB     ----NKSF--PG-RV-SG-PC--CVPTKLAPISMLYY-----EHG---NIVVK-EHEDMI [94]
Aca_nodl       ----RMKR--PN-VA-PL-PC--CVPTRLSPVSMLYF-----EYD---EIVVR-HHEDMV [94]
Bgl_nod        ----RLKR--PN-VA-PA-PC--CVPTRLNPLSMMYY-----EFN---ELVVR-HHEDMI [94]
Lgi_nodal      ----RSKR--KN-SA-PP-AC--CVPTKLNPLSMLYY-----EFD---EIVVR-HHEEMI [94]
Bfl_nodr       ----NLHK--PG-KA-PM-PC--CIPTKLKALSMLYL-----EHG---EVVLR-HHEDMI [94]
Hro_nod        ----STSR--PDLDI-PL-PC--CVPTKLKSLSLLYF-----ENG---EVVQR-DHEEMV [95]
Ame_admp       ----HKMG--LVKGV-ER-PC--CVPTKLLGTTILFY----DDNE---NVILK-VYQDMI [96]
Cin_admp       ----HTLG--LGGQP-VDMPC--CTPDKLYDINLLYF----DHND---YVVLR-RYKDMV [97]
Bfl_80287      ----NALR--LQEDV-GQ-PC--CVPNKLYSINLLYF----DDEE---NVILK-QYDDMV [96]
Xl_admp2       ----HALKL-NK-DI-GT-PC--CVPDELNSINLLYF----DDEE---NVVLK-QYNDMI [96]
Sko_admp       ----NALKL-GD-EV-AM-PC--CVPDKLFSISLLYF----DEDD---NVVLK-QYDDMV [96]
Xl_Admp1       ----NALKL-TK-GV-SS-PC--CVPDKLFSINLLYF----DDDE---NVVLK-QYDDMV [96]
Dre_admp       ----NTLKL-NK-GI-QT-PC--CVPDKLYSISLLYF----DDDE---NVVLK-QYDDMV [96]
Spu_bmp3       ----HLLG--VQTGV-PT-PC--CVPDKMEPLVLLYI----EQDS---TVTLK-KYSDMV [96]
Sko_bmp3       ----HALD--AVKGV-PP-PC--CVPDKLSPLSILYF----DESR---NVVLK-VYPNMV [96]
Bfl_Bmp3       ----RTVG--ITSGV-PS-PC--CVPDKLSSLSILYF----DENR---NVVLK-VYPNMS [91]
Dre_bmp3       ----RAVGVVP--GI-PE-PC--CVPEKMSSLSILFF----DEDK---NVVLK-VYPNMT [96]
Mm_bmp3        ----RAVG--VVSGI-PE-PC--CVPEKMSSLSILFF----DENK---NVVLK-VYPNMT [96]
Xl_Bmp3        ----KAVGI-IP-GV-PE-PC--CTPDMMNSLSVLFL----DEGR---NMVLK-VYPNMS [96]
Mm_gdf10       ----RAVGIVP--GI-PE-PC--CVPDKMNSLGVLFL----DENR---NAVLK-VYPNMS [96]
Nve_1639178    ----HHRY--SK-SV-PA-AC--CVPTRLHSISMLYF----ELDG---SIVLK-EYGEMV [95]
Cgi_gdf3       -----LTM--PK-EY-PRESC--CVPTKLDSISILYY----DEYG---VLTYKPKYDGMV [87]
Tca_bmp10      ----HSVS--PS-KV-SR-SC--CVPTNLDSISILYV----DNNG---VLTYRYAYKDMV [96]
Mm_gdf2        ----HLKF--PT-KV-GK-AC--CVPTKLSPISILYK----DDMG---VPTLKYHYEGMS [96]
Dre_Bmp10      ----SLKS--PQ-VV-SR-AC--CVPTELDPISLLYL----DDAG---VVTYQYKFEGMV [96]
Mm_bmp10       ----HLKN--SQ-KA-SK-AC--CVPTKLDPISILYL-----DKG---VVTYKFKYEGMA [95]
Cel_cet1       ----HSLR--PD-EV-PP-PC--CVPTETSPLSILYM----DVDK---VIVIR-EYADMR [95]
Tad_57057      ----NQHS--PD-EV-PL-PC--CVPTELDPIPLLYI----NARG---KSVLK-SYRDMV [95]
Mm_gdf3        ----HMAD--PK--V-PK-AV--CVPTKLSPISMLYQ----DSDK---NVILR-HYEDMV [94]
Nv_gdf5        ----NSLD--PS-IA-PK-AC--CTPNELSPISILYT---EDGSN---NVVYK-NYKDMV [96]
Bfl99205       ----NSMN--PR-AV-EK-VC--CVPTKLSPISILYI----DGKD---TVVYK-KYDDMV [95]
Dre_con        ----NSMD--PR-ST-PP-TC--CVPTRLSPISILYI----DSAN---NVVYK-QYEDMV [95]
Xl_Gdf5        ----NSMD--PE-TT-PP-TC--CVPTRLSPISILYT----DSAN---NVVYK-QYEDMV [95]
Dre_gdf6       ----NSMN--PS-NM-PP-SC--CVPSKLSPISILYI----DAGN---NVVYK-QYEDMV [95]
Xl_Gdf6        ----NSMN--PG-ST-PP-SC--CVPTKLTPISILYI----DAGN---NVVYK-QYEDMV [95]
Dre_gdf7       ----NSMD--PE-ST-PP-SC--CVPSKLSPISILYI----DSGN---NVVYK-QYEDMV [95]
Nv_Bmp24       ----NTVD----SNV-PN-AC--CIPTTLNPISILSL----NEFD---KVVLK-NYKDMV [94]
Bmi_dpp        ----NSVD--PA-LV-PK-AC--CIPTQLSPISMLYM----DEHN---QVALK-NYQDMM [95]
Pdu_dpp        ----HSVN--PE-AV-PR-PC--CVPTELSPISMLYV----DEHD---KVTLK-NYQDMV [95]
Ami_dpp        ----NSVN--PN-NV-PP-AC--CVPTTLEAISMLFM----NEHS---KVVLK-NYQDMV [95]
Tsp_Tgh3       ----HSVN--PG-AA-PK-SC--CVPTELSPISMLYL----DEYD---KVVLK-TYQDMV [95]
Lj_Bmp24       ----NSVN--PE--V-PR-AC--CIPTELTPIALLYL----DEYE---KVVLK-NYQDMV [94]
Sko_Bmp24      ----NSVS--PD-SV-PK-AC--CVPTDLSPISMLYL----DEFD---KVVLK-NYQDMV [95]
Spu_Bmp24      ----NSVN--PA-LV-PK-AC--CVPTELSAISMLYL----DEYE---KVVLK-NYQDMV [95]
Bfl_Bmp24      ----NSVN--PL-AV-PK-AC--CVPTDLSPISMLYL----NEND---QVVLK-NYQDMV [95]
Xl_Bmp2        ----NSVN----TNI-PK-AC--CVPTELSAISMLYL----DENE---KVVLK-NYQDMV [94]
Sko_univinlike ----NTIE--PNAVK-SK-AC--CAPTKLSSISMLYF----DNND---NVVLR-QYENMV [96]
Spu_uni        ----NSID--NR-AV-PK-VC--CAPTKLSGISMLYF----DNNE---NVVLR-QYEDMV [95]
Bfl_Vg1        ----NSLT--PD-SV-PP-AC--CAPTKWSSISMLYF----DNNG---DVVLR-QYEDMV [95]
Dre_Dvr1       ----HSFD--PK-GT-PQ-PC--CVPIKLSPISMLYY----DNND---NVVLR-HYEDMV [95]
Xl_Vg1         ----HSIE--PE-DI-PL-PC--CVPTKMSPISMLFY----DNND---NVVLR-HYENMA [95]
Xl_der         ----HSVE--PE-NT-PL-PC--CAPTKLSPISMLYY----DNND---NVVLR-HYEDMV [95]
Pca_Bmp58      ----HMML--PD-NI-PG-PC--CAPIRLEPLKVLYL----DESN---NVIMK-TYANMV [95]
Hm_Bmp58       ----HMMY--PE-II-PK-PC--CAPNKLNTLQVLFL----DERN---NVVMK-RYSNMI [95]
Spu_Bmp58      ----HHMS--PS-HV-PQ-PC--CAPTKLSPITVLYY----DDSR---NVVLK-KYKNMV [95]
Nv_Bmp58       ----HLMN--PK-TV-PK-PC--CAPTELSPISVLYF----DQDN---NVVLK-KYNKMV [95]
Sko_Bmp58      ----HLMD--PE-AV-PK-PC--CAPTKLNAISVLYF----DDSS---NVILK-KYRNMI [95]
Xl_Bmp7        ----HFIN--PD-TV-PK-PC--CAPTQLNAISVLYF----DDSS---NVILK-KYRNMV [95]
Dre_Bmp6       ----HLMN--PE-NV-PK-PC--CAPTKLHAISVLYY----DDNS---NVILK-KYRNMV [95]
Mm_Bmp6        ----HLMN--PE-YV-PK-PC--CAPTKLNAISVLYF----DDNS---NVILK-KYRNMV [95]
Ml_TGFbB       ----NYNN--PMAS--PR-PC--CTPASLSDLSIMFSSGKVDSTGQPLDVEIH-NLEDMV [102]
Tad_57877      -------E--EDNSL-I--PC--CSPGKMSSLTIIYQ----DSNG---YLHSV-ILPNMR [89]
Ame_act        -----KMD--RLAGM-Q--PC--CAPLKFSPMSLIYY----GPDS---NIIKR-DLPKMV [96]
Dme_act        -----KMG--LMNGM-R--PC--CAPIKFSSMSLIYY-----GDD---GIIKR-DLPKMV [95]
Mm_InhBe       ----KANNPWPA-GS----SC--CVPTARRPLSLLYL----DHNG---NVVKT-DVPDMV [97]
Mm_actBc       ----KANA--AAGTT-GRGSC--CVPTSRRPLSLLYY----DRDS---NIVKT-DIPDMV [99]
Xl_actD        ----KANN--IQTAV-N--SC--CVPTKRRPLSMLYF----DRNN---NVLKT-DIADMI [97]
Dre_inhBb      ---MRGYS--PFNNI-K--SC--CVPTRLRAMSMLYY----NEEQ---KIIKK-DIQNMI [99]
Dre_actBb      ---MRGMS--PGSVN----SC--CIPTKLSTMSMLYF----DDEY---NIVKR-DVPNMI [98]
Spu_gdf11      ----RLAV--AG-------PC--CSPSKMTSVSLLIF----DEDG---DIRNA-ELQDMA [88]
Nv_mst         ----------------GKRPC--CSPTKMSSISMIYF----DFNQ---QIMFE-EVPAMV [85]
Bfl_Mstn       ----------KAGSV-G--PC--CTPTKMSNISMLYF----DDDG---NIIYA-KLPDMK [88]
Tca_myo        ----------PNSAQ----PC--CAPRKMSAISMLYF----DNQL---NVVYG-SLPGMV [87]
Mm_mst         ----------PRGSA-G--PC--CTPTKMSPINMLYF----NGKE---QIIYG-KIPAMV [88]
Dre_mstn2      ----------PRGSA-G--PC--CTPTKMSPINMLYF----NDRE---QIIYG-KIPSMV [84]
Dre_mstn       ----------PRGTA-G--PC--CTPTKMSPINMLYF----NGKE---QIIYG-KIPSMV [88]
Nv_act         ----LLRK--QRELS----PC--CAPTKMFDLSLLYY----DKDE---NLFQE-NVSNMV [92]
Sko_activin    LYSRHNSQ--RPSDL-T--PC--CTPTAMSGITLLYY----NSTG---YIIKK-NLPNMS [98]
Bfl244225      ---LSQKD--RETRL-KLTPC--CTPTKMSALSMLYF----DNDG---YIFNK-NLPNMK [96]

Dre_gdnf       AKKCACV [94]
Xl_Gdnf        AKKCGCI [94]
Mm_gdnf        AKRCGCI [94]
Mmu_artemin    ATACGCL [97]
Mm_neurt       ARECACV [95]
Mmu_persephin  AAACGC- [89]
Ml_Tgf1b       VSSCKCR [98]
Ml_Tgf1a       VKECRCR [98]
Aq_tgf         VAECSCV [106]
Ml_Tgf4        VGGCGCV [106]
Ml_Tgf2        ITKCKCL [101]
Ml_TGFbA       VTECGCK [96]
Spu_lefty      VEDCSCL [108]
Sko_lefty      VEECECL [87]
Cs_lefty       IEKCSCA [88]
Dre_lefty      VEKCGCA [87]
Dre_lefty2     VEKCGCS [88]
Xl_lefty       VEKCGCT [90]
Tad_9129       AE----- [79]
Ml_Bmp3        VDSCSCR [100]
Ml_Tgf3        VTSCKCV [97]
Spu_actB       ILSCGCS [99]
Tad_58663      VETCGCH [102]
Cin_Tgfb2      LLSCKCS [98]
Sko_TGFb2      LTSCKCS [98]
Dre_Tgfb1      VRNCKCS [98]
Bfl_Tgf        VTSCKCS [98]
Sja_TGFb1      VRSCKCS [98]
Dre_Tgfb3      VKSCKCS [98]
Dre_Tgfb2      VKSCKCS [98]
Xl_Tgfb2       VKSCKCS [98]
Ml_Bmp58       VEQCGCE [99]
Tca_actl       VESCGCW [107]
Tad_9164       VDACG-- [84]
Xl_Xnr2        VDECGCN [101]
Xl_Xnr6        VEDCGCN [101]
Spu_nod        VEECGCR [102]
Sko_nodalC     VQECGCR [99]
Sko_nodalA     IQECGCR [101]
Sko_nodalB     VEECGCR [101]
Aca_nodl       ADECGCR [101]
Bgl_nod        ATECGCR [101]
Lgi_nodal      ASECGCR [101]
Bfl_nodr       VDECGCQ [101]
Hro_nod        VEECGCR [102]
Ame_admp       ADRCGC- [102]
Cin_admp       AASCAC- [103]
Bfl_80287      AANCGCH [103]
Xl_admp2       AVSCGCH [103]
Sko_admp       AASCGCH [103]
Xl_Admp1       AGSCGCH [103]
Dre_admp       AGSCGCR [103]
Spu_bmp3       VESCGCH [103]
Sko_bmp3       VDTCACR [103]
Bfl_Bmp3       VESCACR [98]
Dre_bmp3       VDSCACR [103]
Mm_bmp3        VDSCACR [103]
Xl_Bmp3        VESCSCR [103]
Mm_gdf10       VETCACR [103]
Nve_1639178    AASCGCR [102]
Cgi_gdf3       VTECGCR [94]
Tca_bmp10      VLECGCR [103]
Mm_gdf2        VAECGCR [103]
Dre_Bmp10      VAKCGCR [103]
Mm_bmp10       VSECGCR [102]
Cel_cet1       VESCGC- [101]
Tad_57057      VRQCGCR [102]
Mm_gdf3        VDECGCG [101]
Nv_gdf5        VERCGCS [103]
Bfl99205       ADQCGCR [102]
Dre_con        VESCGCR [102]
Xl_Gdf5        VESCGCR [102]
Dre_gdf6       VESCGCR [102]
Xl_Gdf6        VESCGCR [102]
Dre_gdf7       VESCGCR [102]
Nv_Bmp24       IEGCGCR [101]
Bmi_dpp        VMGCGCR [102]
Pdu_dpp        VVGCGCR [102]
Ami_dpp        VDGCGCR [102]
Tsp_Tgh3       VESCGCR [102]
Lj_Bmp24       VEGCGCR [101]
Sko_Bmp24      VEGCGCR [102]
Spu_Bmp24      VEGCGCR [102]
Bfl_Bmp24      VEGCGCR [102]
Xl_Bmp2        VEGCGCR [101]
Sko_univinlike VEACGCL [103]
Spu_uni        VEACGCR [102]
Bfl_Vg1        VDGCGCR [102]
Dre_Dvr1       VDECGCR [102]
Xl_Vg1         VDECGCR [102]
Xl_der         VDECGCK [102]
Pca_Bmp58      VNDCGCQ [102]
Hm_Bmp58       VQHCGCQ [102]
Spu_Bmp58      VRACGCL [102]
Nv_Bmp58       VKACGCH [102]
Sko_Bmp58      VKSCGCH [102]
Xl_Bmp7        VRACGCH [102]
Dre_Bmp6       VRSCGCH [102]
Mm_Bmp6        VRACGCH [102]
Ml_TGFbB       VDECGCS [109]
Tad_57877      VEQCQCF [96]
Ame_act        VDECGCP [103]
Dme_act        VDECGCP [102]
Mm_InhBe       VEACGCS [104]
Mm_actBc       VEACGCS [106]
Xl_actD        VEACGCS [104]
Dre_inhBb      VDECGCS [106]
Dre_actBb      VEECGCA [105]
Spu_gdf11      VEKCDCA [95]
Nv_mst         AETCGCT [92]
Bfl_Mstn       VDRCGCS [95]
Tca_myo        VDRCGCS [94]
Mm_mst         VDRCGCS [95]
Dre_mstn2      VDLCGCS [91]
Dre_mstn       VDRCGCS [95]
Nv_act         VEECGCS [99]
Sko_activin    VESCGC- [104]
Bfl244225      VDACGCS [103]

;
END;
