# Supplementary material for: Evolution of the TGF-β Signaling Pathway and Its Potential Role in the Ctenophore, Mnemiopsis leidyi
Source: PLoS One. 2011 Sep 8;6(9):e24152. doi: 10.1371/journal.pone.0024152 (PMC3169577; doi:10.1371/journal.pone.0024152)
Supplement: Text S3 — Amino acid alignment of Smad proteins used in Figure 5 . Shown here are the MH1 and MH2 domains. (NEX) [file pone.0024152.s004.nex]

#NEXUS
[!Created by MacVector on Sep 08 2010 at 15:19:56.]

BEGIN DATA;
	DIMENSIONS NTAX=43 NCHAR=352;
 	FORMAT MISSING=X GAP=- INTERLEAVE DATATYPE=PROTEIN;
MATRIX
Mbre_MH2    ------------------------------------------------------------ [0]
Aqu1.204818 ------------------------------------------------------------ [0]
Aqu1.211302 ------------------------------------------------------------ [0]
Mle_Smad4   ----GG-EDETFAKRAIESLVKKLKEKR-DELD--ALIIAVTMSGRRPSKCVTIQRTLDG [52]
Aqu1.229767 ----GSLETNEFAQRAIESLVLKIKDKS-DELE--SLVTAITTGGTKPSICVTIPRTLDG [53]
Aqu1.215834 ----GG-ESEQFAKRAVESLVKKLKDKR-DELE--SLVTAITTNGARPSKCVTIPRTLDG [52]
Ta_Smad4    ----GG-ESENFAKRAVESLVKKLKDKR-DELD--ALITAVTSNGIQQSKCVTIARTLDG [52]
Nve1623482  ----GG-ESEAFAKRAIESLVKKLKEKK-DELD--SLITAITSAGTHPSKCVTIQRTLDG [52]
Dme_Medea   ----GG-ESEGFAKRAIESLVKKLKEKR-DELD--SLITAITTNGAHPSKCVTIQRTLDG [52]
Tca_Smad4   ----GG-ESEGFAKRAIESLVKKLKEKR-DELD--SLITAITTSGAHPSKCVTIQRTLDG [52]
Hro_Smad4   ----GG-ESETFAKRAIESLVKKLKEKK-DELE--GLIAAITTNGAHPTTCVTIQRTLDG [52]
Bfl245341   ----GG-ETETFAKRAIESLVKKLKEKK-DELD--SLITAITTNGAHPSKCVTIQRTLDG [52]
Mmu_SMAD4   ----GG-ESETFAKRAIESLVKKLKEKK-DELD--SLITAITTNGAHPSKCVTIQRTLDG [52]
Aqu1.225807 ----GE-EDHKKAEKEIKSLVKKLKKKE--NLH--ELERALSSGGDIPTRCVTLPRQLDG [51]
Aqu1.216777 ----GD-DIGKSTELIVKSLVNKLEKQEAGSLE--ELECALSHTNP-QTHCVTIARTFSG [52]
Mle_Smad1a  ----GD-EEEKWALRAIEALEKKLRKNK-GAVM--ELENALATQSA-DSKCVTIPRSLDG [51]
Mle_Smad1b  ----GD-EEEKWASKAVEALEKKLKKKK-GMLE--ELERALSCPNI-RTECVTIPRSLDG [51]
Ta_Smad1    ----AD-KEDKWSEKAIKSLVKKLKRN--GGLN--ELLNAISTQSS-ATKCIRIRRSLDG [50]
Hro_Smad2_3 ----NA-QDEKFAEKSIRFLVN--KKKP-KLTE--DVEAAVMQQTS-KTKCIVIYRSKNG [49]
Mle_Smad2   ----GD-EEDKWAEKAVKSLVKKLKK-T-GGLD--ELEKAITSQG--PTLCVKIPRSLDG [49]
Dme_Smad2   GNEDNS-VEGKWSEKAVKNLVKKIKKNS--QLE--ELERAISTQNC-QTRCVTVPRSKPA [54]
Nv1631657   ----GD-EDDKWAEKAVKSLVKKLKK-T-GGLE--ELEKAITNPGV-ATKCVTIPRSLDG [50]
Spu_Smad2_3 ----DN-SEDKWSEKAVKSLVKKLKK-T-GCLE--ELERAVTTQNS-QTKCITIPRSLDG [50]
Mmu_Smad3   ----NG-QEEKWCEKAVKSLVKKLKK-T-GQLD--ELEKAITTQNV-NTKCITIPRSLDG [50]
Mmu_Smad2   GGEQNG-QEEKWCEKAVKSLVKKLKK-T-GRLD--ELEKAITTQNC-NTKCVTIPRSLDG [54]
Aqu1.228116 ----GD-EDDKWAEKAIDSLVKKLKKQK-GSLE--ELERALSQANP-QTHCVTIARSLDG [51]
Aqu1.229822 ----GD-EDNKWAEKAIDSLVKKLKKQR-GSLE--ELERALSQANP-QTRCVTIVRSLDG [51]
Ta_Smad2    ----GD-EEEKWAEKAIDSLVKKLKRKK-GALE--ELEKALSCPGQ-PTNCVTIPRSLDG [51]
Hvu_Smad1   ----GD-EEEKWAEKAIDSLVKKLKKRK-GALE--ELEKALSNPSSGNSKCVTIPRSLDG [52]
Nve_Smad1_5 ----GD-EEEKWAEKAIESLVKKLKKKK-GALE--DLEKALSNPNQ-QSKCVTIARSLDG [51]
Tca971286   ----GD-EEEKWAEKAVDSLVKKLKKRK-GAIE--ELERALSCPGT-QSNCVTIPRSLDG [51]
Dme_Mad     ----GD-EEEKWAEKAVDSLVKKLKKRK-GAIE--ELERALSCPGQ-PSKCVTIPRSLDG [51]
Spu_Smad5   ----GD-EEEKWAEKAVDSLVKKLKKKK-GAME--ELERALSRPGE-LSKCVTIPRSLDG [51]
Bfl115184   ----GD-EEEKWAEKAVDSLVKKLKKKK-GAME--ELEKALSCPGQ-PSKCVTIPRSLDG [51]
Mmu_Smad8   ----GD-EEEKWAEKAVDSLVKKLKKKK-GAMD--ELERALSCPGQ-PSKCVTIPRSLDG [51]
Mmu_Smad1   ----GD-EEEKWAEKAVDALVKKLKKKK-GAME--ELEKALSCPGQ-PSNCVTIPRSLDG [51]
Mmu_Smad5   ----GD-EEEKWAEKAVDALVKKLKKKK-GAME--ELEKALSSPGQ-PSKCVTIPRSLDG [51]
Mle_Smad6   -------SSAKNTYDPTSQGLAKVFLKDIGEIEVLQLLLTVLKEGALGTTCIVVNSQDK- [52]
Tca_Smad6   -------GAPDDDGDGVMVLLKQLQENQLGMLW--TAVESRGRDGG--SNCVLMPRDRQ- [48]
Ta_Smad6    -------MDVKF------------------------------------------------ [5]
Nve1631691  -------------KTTTHSILRRLRDTE---LG--LLLKALESRGGDVSSCVYFPYGEKV [42]
Mmu_Smad7   -------GAEADLKALTHSVLKKLKERQ---LE--LLLQAVESRGGTRTACLLLPGRLDC [48]
Sko_Smad6   -GEPGETEADLELKTTSQSIFKRLKDRQ---LE--LLVQALESKGGAISSCVLLAK---G [51]

Mbre_MH2    ------------------------------------------------------------ [0]
Aqu1.204818 --------------------MPE---------------------------IIPVSYED-- [11]
Aqu1.211302 MLQLPAVTGPPGIPGSQAARDDE------------------------------------- [23]
Mle_Smad4   RLQVAGKKGFPHVIYARLWRWPDL--HKNELKHISVCQYAFDLKC-DLVCVNPYHYERVI [109]
Aqu1.229767 RLQVSGRKGYPHVMYAKIWRWPDL--HKDELRCIELCQYAFDLNR-ESVCVNPYHYERVV [110]
Aqu1.215834 RLQVAGRKGFPHVIYAKIWRWPDL--HKNELRHAQFCQYAFDLKC-ESVCVNPYHYERVV [109]
Ta_Smad4    RLQVAGKKGFPHVIYSRIWRWPDL--HKNELKHIKLCKFAFDLKL-DHVCVNPYHYERVI [109]
Nve1623482  RLQVAGRKGFPHVIYARIWRWPDL--HKNELRHVKYCQFAFDLKC-DSVCVNPFHYERVV [109]
Dme_Medea   RLQVAGRKGFPHVIYARIWRWPDL--HKNELKHVKYCAFAFDLKC-DSVCVNPYHYERVV [109]
Tca_Smad4   RLQVAGRKGFPHVIYARIWRWPDL--HKNELKHVKYCQFAFDLKC-DSVCVNPYHYERVV [109]
Hro_Smad4   RLQVAGRKGFPHVIYARLWRWPDL--HKNELKHLKICKYAFDLKC-DSVCINPYHYERVV [109]
Bfl245341   RLQVAGRKGFPHVIYARIWRWPDL--HKNELKHVKYCQYAFDLKA-DSVCVNPYHYERVV [109]
Mmu_SMAD4   RLQVAGRKGFPHVIYARLWRWPDL--HKNELKHVKYCQYAFDLKC-DSVCVNPYHYERVV [109]
Aqu1.225807 KDGASAQSRLPHVVYCRIWRWPDL-QSHHELKPADVCQYSYYNRKSEEVCINPYHYIRIV [110]
Aqu1.216777 RMQVAHIRKLPHVLYCRLWRWPDL-KNHHELELLENCEFGYSKNK-DKVCINPYHYKRVE [110]
Mle_Smad1a  RLQVSHRKALPHVIYCRVWRWPDL-QSHHELKAIETCEFGYENKA-KDVCINPYHYRRIE [109]
Mle_Smad1b  RLQVSHRKGLPHVIYCRVWRWPDL-QTHHELKSVDYCKFGFAEKN-KEVCINPYHYIRVE [109]
Ta_Smad1    RLQVCQKKGLPHVIYCRLWRWPDL-QSCYELRAIETCEYAFTLKK-DEVCVNPYHYQRVE [108]
Hro_Smad2_3 STDIASHKLHPHVWFCRLWRWPDL-TSQVELRAIPSCECPFDQDK-DQICVQPYHYSRVE [107]
Mle_Smad2   RLQVSHRKGLPHVIYCRLWRWPDL-QSHHELRALDCCEFAFHLKR-DEVCVNPFHYQRIE [107]
Dme_Smad2   PAGEHLRKGLPHVIYCRLWRWPDL-QSQNELKPLDHCEYAFHLRK-EEICINPYHYKKIE [112]
Nv1631657   RLQVSHRKGLPHVIYCRLWRWPDL-QSHHELRPIEACEFAFSLKK-EEVCVNPFHYQRVE [108]
Spu_Smad2_3 RLQVSHRKGLPHVIYCRLWRWPDL-QSHHELKAVERCEYAFHLKK-DEVCVNPYHYARVE [108]
Mmu_Smad3   RLQVSHRKGLPHVIYCRLWRWPDL-HSHHELRAMELCEFAFNMKK-DEVCVNPYHYQRVE [108]
Mmu_Smad2   RLQVSHRKGLPHVIYCRLWRWPDL-HSHHELKAIENCEYAFNLKK-DEVCVNPYHYQRVE [112]
Aqu1.228116 RLQVSHRKGLPHVIYCRVWRWPDL-QNHHELKPLDHCEFAYSRNK-GEVCINPYHYKRVE [109]
Aqu1.229822 RMQVSHRKGLPHVIYCRVWRWPDL-QNHHELKALDHCEFAFSRNK-GDVCINPYHYKRVE [109]
Ta_Smad2    RLQVSHRKGLPHVIYCRVWRWPDL-QSHHELKPLPMCEYAFHYKL-KDVCVNPYHYQRVE [109]
Hvu_Smad1   RLQVSHRKGLPHVIYCRVWRWPDL-QSHHELKPLDCCEFAFGLNK-KEVCINPYHYRRVE [110]
Nve_Smad1_5 RLQVSHRKGLPHVIYCRVWRWPDL-QSHHELKPLECCEYAFGLKQ-KEVCINPYHYHRVE [109]
Tca971286   RLQVSHRKGLPHVIYCRVWRWPDL-QSHHELKPLEHCKFPFSAKQ-KEVCINPYHYKRVE [109]
Dme_Mad     RLQVSHRKGLPHVIYCRVWRWPDL-QSHHELKPLELCQYPFSAKQ-KEVCINPYHYKRVE [109]
Spu_Smad5   RLQVSHRKGLPHVIYCRVWRWPDL-QSHHELKALDCCDYAFGKKQ-KEVCINPYHYKRVE [109]
Bfl115184   RLQVSHRKGLPHVIYCRVWRWPDL-QSHHELKPLEHCNYPFGAKDTKEVCINPYHYKRVE [110]
Mmu_Smad8   RLQVSHRKGLPHVIYCRVWRWPDL-QSHHELKPLECCEFPFGSKQ-KEVCINPYHYRRVE [109]
Mmu_Smad1   RLQVSHRKGLPHVIYCRVWRWPDL-QSHHELKPLECCEFPFGSKQ-KEVCINPYHYKRVE [109]
Mmu_Smad5   RLQVSHRKGLPHVIYCRVWRWPDL-QSHHELKPLDICEFPFGSKQ-KEVCINPYHYKRVE [109]
Mle_Smad6   -----------HLTACKLWRWPLY-RTMPTLKRVPIC----NDRCNETECLNPYHY---- [92]
Tca_Smad6   ----------PHVLCCQTWRWPDL-LQSTDLKRLPACRFAGDPVY---VCCNPYHWSRVY [94]
Ta_Smad6    -----------HVLLSCLFRWPDMIGEDYELKRLATCTTCIENDL-DEVCINPHHYGRIN [53]
Nve1631691  CKRVVHE---PHVVLYRTFREPNV-QSSNELKPLAIC--SRRDSTGKRVCINPHHYSEII [96]
Mmu_Smad7   RLQPPSSYSLP-LLLCKVFRWPDL-RHSSEVKRLCCCESYGKINP-ELVCCNPHHLSRLC [105]
Sko_Smad6   DLRLGRRTVCPRVVLCQLFRWPDL-RHSYELKPLTFCCDHARNQGNDDICCNPFHLSRVC [110]

Mbre_MH2    ------------------------------------------------------------ [0]
Aqu1.204818 --------------------T---AVLCSVQYHELTQSLDSPFDALSSHEH---IVVDGF [45]
Aqu1.211302 ------------------------ASFLNFQNWLMQLVLSHSRDSVVKLGN-------GT [52]
Mle_Smad4   SPAPPSRLVKDPILRGQLISP---EHWCSVQYFELDHKVGETFKVIAQYRE---VKIDGY [163]
Aqu1.229767 SPVIPPPLAPPTINPVTTCTP---DFWCKILYHELAIPVGECFKVPANITS---VSVDGF [164]
Aqu1.215834 SPSSSPLLLNQYVPPVPQAVP---DFWCKISYYEMDAPVGECFKVPASLTS---VSVDGF [163]
Ta_Smad4    SPGYNDISIPRPISSQP---P---DNWCTIAYYELDLQVGESFKVPSQFHT---VSVDGF [160]
Nve1623482  SPDIAGLSLSRQA-------P---ENWCSIAYFELDQQVGEIFKVTSNCPS---VTVDGY [156]
Dme_Medea   SPGIDGLSLPRLLSRQP--PP---EYWCSIAYFELDTQVGETFKVPSAKPN---VIIDGY [161]
Tca_Smad4   SPGIDLSGLTLAGLLSTQPAP---EYWCSVAYFELDTQVGETFKVPSSCPN---VTIDGY [163]
Hro_Smad4   SPGIDLSGLT-LYMPISNHPP---EFWCSITSYEMDVQVGETFKVPASCPA---VTVDGY [162]
Bfl245341   SPGIDLSGLTLNMPLSSRPGP---EYWCSIAYFEMDVQVGEIFKVPSSCPT---VTVDGY [163]
Mmu_SMAD4   SPGIDLSGLTLQPPISNHPAP---EYWCSIAYFEMDVQVGETFKVPSSCPV---VTVDGY [163]
Aqu1.225807 APPIMPVLVPNDYHPITYTEP---AYWCSISYHELGTKVGETFQA--IRPS---IIVDGG [162]
Aqu1.216777 TQ--HNFNLNSGTVAEQYQKP---PIWCSIDYWELDKQVGETFKA--SLND---VVVDGF [160]
Mle_Smad1a  SPILPPVLVPREYSEVRMEQP---SVWASFTYYELNTRVGDPYHAQMIYPDHNYVIIDGY [166]
Mle_Smad1b  TPILPPVLVPRDHVSIPFREP---AHWAKVTYYELNTRVGEPFTALSQHSQ---IIIDGF [163]
Ta_Smad1    TPALRPVLVPKDAQLVTYTEP---ENWCSIAYYELNTRIGEYWNA--FQPT---LIIDGF [160]
Hro_Smad2_3 APVLPPVLVPKDAQPVAYCEP---PFWCSISYYEMNQRVGETFHA--SQPS---LTVDGF [159]
Mle_Smad2   TPVLPPVLVPREFQAIQFVEP---KFWCDISYYELNNRVGEAFHA--SESS---LWIDGF [159]
Dme_Smad2   LSILVPKSLPTDAAPVMYHEP---AFWCSISYYELNTRVGETFHA--SQPS---ITVDGF [164]
Nv1631657   TPVLPPVLVPRDAQPIQYTEP---TYWCSISYYEMNTRVGETFHA--SQPS---LTVDGF [160]
Spu_Smad2_3 TPVLPPVLVPRDLQPVSYCEP---PFWCSIAYYEMNQRVGETFHA--SQPS---LTIDGF [160]
Mmu_Smad3   TPVLPPVLVPRDLQPVTYCEP---AFWCSISYYELNQRVGETFHA--SQPS---MTVDGF [160]
Mmu_Smad2   TPVLPPVLVPRDLQPVTYSEP---AFWCSIAYYELNQRVGETFHA--SQPS---LTVDGF [164]
Aqu1.228116 TPVLPPVLVPRGTVAVQYQEP---PYWCSIVYYELNNRVGEVFKA--SLND---VVVDGF [161]
Aqu1.229822 APVLPPVLVPQGPVAIRYQEA---PNWCSILYYELNNRVGEVFKA--SSND---VVVDGF [161]
Ta_Smad2    TPVLPPVMVPRELQPVTYQEP---NCWCTVAYYELNNRVGEPFHA--SQAS---LIIDGF [161]
Hvu_Smad1   TPVLPPVLVPRDVTPITYQDP---LNWCSIAYYELNLRVGEPFHA--SGTS---LIIDGF [162]
Nve_Smad1_5 SPGLPPVLVPRHVTAVNYQEP---LSWCSIAYYELNNRVGELFHA--KSTS---LIVDGF [161]
Tca971286   SQVLPPVLVPRDVQPVAYQEQ---PYWASIAYYELNCRVGEVFHC--HSTS---VIVDGF [161]
Dme_Mad     SPVLPPVLVPRDVAQVSYSEP---AFWASIAYYELNCRVGEVFHC--NNNS---VIVDGF [161]
Spu_Smad5   SPVLPPVLVPRDFTPVTYQEP---QSWCSIAYYELNNRVGEPFHA--TTTS---VIVDGF [161]
Bfl115184   SPVLPPVLVPRDVQPVTYQEP---VYWASIAYYELNNRVGEPFHA--KSHS---IIVDGF [162]
Mmu_Smad8   TPVLPPVLVPRDFRPVCYEEP---QHWCSVAYYELNNRVGETFQA--SSRS---VLIDGF [161]
Mmu_Smad1   SPVLPPVLVPRDVQAVAYEEP---KHWCSIVYYELNNRVGEAFHA--SSTS---VLVDGF [161]
Mmu_Smad5   SPVLPPVLVPRDVQPVAYEEP---KHWCSIVYYELNNRVGEAFHA--SSTS---VLVDGF [161]
Mle_Smad6   -------FLTMTFNTEDGEST---GTWCNVAYWEHNQRIGALHCV--NDPI---VAIANN [137]
Tca_Smad6   QPDTPPPPYSKSLRN-----P---SEWCRLAYWELAQRVGPLFPV--EAPA-----VNVF [139]
Ta_Smad6    LESVPPYVIYQLYSSICKASD---SSWCAIAYWEFRERVGRIFDV--KSST-----VNIF [103]
Nve1631691  QIRKCKCLLKVELFESTSEWP---SAWCVVAYWELNECIGPFYHG---HQD----VINIY [146]
Mmu_Smad7   ELESPPPPYSRYPMSQLLLEPGDRSHWCVVAYWEEKTRVGRLYCV--QEPS-----LDIF [158]
Sko_Smad6   GPESPPPPYSQSQ-------P---IHWCNVAYWELRSRVGRLYQV--NHQS-----ANIF [153]

Mbre_MH2    ------------LSDIDN--PCRDSRTEKIRRFIGSGLQVSIRR-KCLYVTRLSRNPVFL [45]
Aqu1.204818 TDPNEPKSSRYCLGRITN--VNRNEAINKARKFIGNGIIIRFRN-HELVVENHGSAAVFV [102]
Aqu1.211302 GIP--------CLFHKLS--HENHSAIE--------GIIIEEKNETEVWIKCLSNHSVFV [94]
Mle_Smad4   VNP--SEPNRFCLGQLSN--VHRTEASEKARLHVGKGVKLTLSGEGDVWLECQSQHPVFV [219]
Aqu1.229767 VDP--SAVDRFCLGRLSN--VHRTEPSKRVISHIEKGIVIEEKNETEVWIRCVSRHSVFV [220]
Aqu1.215834 VDP--SGGDRFCLGRLSN--VHRTEASERARLHIGKGIIIEEKNETEVWIRCVSEHSVFV [219]
Ta_Smad4    VDP--SGGNRFCLGQLSN--VHRTKESERARLHIGKGVRLECHGEGDVWLSCLSEHSVFV [216]
Nve1623482  VDP--SGGNRFCLGQLSN--VHRTEASERARLHIGKGVQLDVRGEGDVWVRCLSEHSVFV [212]
Dme_Medea   VDP--SGGNRFCLGALSN--VHRTEQSERARLHIGKGVQLDLRGEGDVWLRCLSDNSVFV [217]
Tca_Smad4   VDP--SGGNRFCLGALSN--VHRTDQSERARLHIGKGVQLDLRGEGDVWLRCLSDHSVFV [219]
Hro_Smad4   VDP--SGGDRFCLGQLSN--VHRTEASEKARLHIGKGVQLVCHGEGDVWVKCLSDHAVFV [218]
Bfl245341   TDP--SGIDRFCLGQLSN--VHRTEASERARLHIGKGVQLDLRGEGDVWVRCLSDHAVFV [219]
Mmu_SMAD4   VDP--SGGDRFCLGQLSN--VHRTEAIERARLHIGKGVQLECKGEGDVWVRCLSDHAVFV [219]
Aqu1.225807 TDP--GTTDRFCLGKMCN--VNRDNITIQARKHIGQGIKLMYIG-GEVHLECLGKNAVFV [217]
Aqu1.216777 INP-STTGSRFCLGVLSS--SHRSKTIEDTRCLIGKGVHLNYAI-GAVSAVSVGQHPVFV [216]
Mle_Smad1a  TEP-GNNQQRFCLGQLSN--VSRNNTVEKTRKHIGRGVKISFED-NKVYIECLGDSAVFV [222]
Mle_Smad1b  TDP-GMNKDRYCIGLLSN--VARNPMIEATRKHINRGVKLTKVN-GEVHAECLSDSAIFV [219]
Ta_Smad1    TDP--SNSERFCLGLLSN--VNRDPTVEMTRREIGKGVRLCYVH-GEVFAECCSKHAVFV [215]
Hro_Smad2_3 TDP--SNSERFCLGLLSN--IHRVTQIELTRRHIGKGVRLYYIG-GEVFAECLSESSIFV [214]
Mle_Smad2   TDP--SNNRRFCLGQLTN--INRTPPVEKCRKQIGKGIHLQYVQ-GEVHAVCLSDSSIFV [214]
Dme_Smad2   TDP--SNSERFCLGLLSN--VNRNEVVEQTRRHIGKGVRLYYIG-GEVFAECLSDSSIFV [219]
Nv1631657   TDP--SSSDRFCLGLLSN--INRNPPIEMTRKHIGKGVRLYYIG-GEVFAECLSDSSIFV [215]
Spu_Smad2_3 TDP--SSSERFCLGLLSN--VNRDPQVEQTRRHIGKGVRLYYIG-GEVFAECLSDSSIFV [215]
Mmu_Smad3   TDP--SNSERLCLGLLSN--VNRNAAVELTRRHIGRGVRLYYIG-GEVFAECLSDSAIFV [215]
Mmu_Smad2   TDP--SNSERFCLGLLSN--VNRNATVEMTRRHIGRGVRLYYIG-GEVFAECLSDSAIFV [219]
Aqu1.228116 TDP-STTGDRFCLGLLSS--VHRNSTIENTRRHIGKGVHLVYVN-GEVFAECLSENSIFV [217]
Aqu1.229822 TDP-STTGERFCLGQFSS--IRRSGLIENTRRHIGKGVHLVYVN-GEVIADCLSENAIFV [217]
Ta_Smad2    TDP-STNADRFCLGLLSN--VNRNSTIENTRRHIGKGVHLYYVG-GEVYAECLSESSIFV [217]
Hvu_Smad1   TDP-NTSSDRFCLGGMSN--VNRNSTIENTRRHISKGVHLYYVG-GEVFAECLSDSAVFV [218]
Nve_Smad1_5 TDPNTTNSERFCLGLLSN--VNRNSTIENTRRHIGKGVHLYYVG-GEVYAECLSDSAIFV [218]
Tca971286   TNP-SNNSDRFCLGQLSN--VNRNSTIENTRRHIGKGVHLYYVN-GEVYAECLSDSPIFV [217]
Dme_Mad     TNP-SNNSDRCCLGQLSN--VNRNSTIENTRRHIGKGVHLYYVT-GEVYAECLSDSAIFV [217]
Spu_Smad5   TDP-SNNHDRFCLGLLSN--VNRNSTIENTRRHIGKGVHLYYVG-GEVYAECLSDSSIFV [217]
Bfl115184   TDP-SNSGDRFCLGLISN--VNRNSTIENTRRHIGKGVHLYYVG-GEVYAECLSDSAIFV [218]
Mmu_Smad8   TDP-SNNRNRFCLGLLSN--VNRNSTIENTRRHIGKGVHLYYVG-GEVYAECVSDSSIFV [217]
Mmu_Smad1   TDP-SNNKNRFCLGLLSN--VNRNSTIENTRRHIGKGVHLYYVG-GEVYAECLSDSSIFV [217]
Mmu_Smad5   TDP-SNNKSRFCLGLLSN--VNRNSTIENTRRHIGKGVHLYYVG-GEVYAECLSDSSIFV [217]
Mle_Smad6   ISH-----GGLDLSKIANDDVSRDEVTARVRKHIGSGILVSLEE-DGIWLYNRSEISIFV [191]
Tca_Smad6   GDV--PYCDGLSLETLAQQNCNAPESVRHGRCKIGLGVTLSHEG-GSVWVYNRSENPIFV [196]
Ta_Smad6    QQL--PEGEGFWLGALSN--TDSNQCDSRVFHRIGYGLQLSRED-DSVWIYNRSEHPLYV [158]
Nve1631691  ETL--PKPKGFCLAGLDR-NQNVSDGTKRARNHVGFGLQLSREE-DGIWIYNRSEYAVFA [202]
Mmu_Smad7   YDL--PQGNGFCLGQLNS--DNKSQLVQKVRSKIGCGIQLTREV-DGVWVYNRSSYPIFI [213]
Sko_Smad6   QEL--PHGDGLCLGLLDR--ECRTESVIRTRTKIGYGVTISREQ-DGVWAYNRSNHAMFV [208]

Mbre_MH2    KNYQSPSTVSDSILLRENGELPDGAEVCLFDYQVFSKEIARMPAELAL------KMATVS [99]
Aqu1.204818 NSKMTNFEHC-LPRSTVI-KVPNNYYLKIFDTSLFSYVLSKTAKDGRDETMDLVELCSIQ [160]
Aqu1.211302 QSCYLDYEAGQAQGIAVH-KIFPDAYVKVFDLFHSYEEMQKQARKANIGVDELRPLCILR [153]
Mle_Smad4   QSQYLDKEAKRAPGDAVH-KIFPGTHLKVFDLHDCYDTIKNKAQKAQSGVDDLRRMCILR [278]
Aqu1.229767 QSNYLDYQAGQAQGDAVH-KIYPNAYIKVFDLSYCYEEMQKQARKASIGVDDLRRLCILR [279]
Aqu1.215834 QSYYLDYQAGRALGDAVH-KIYPKAYIKVFDLRHCYEEMQKQAHEASIGVDDLRRLCILR [278]
Ta_Smad4    QSYYLDREAGRGPFDYVH-KVYPKAYIKVFDLQLCYQQMQQEASKAQAGVDDLRRLCILR [275]
Nve1623482  QSYYLDREAGRCPGDAVH-KIYPSAYIKVFDLRALLPQMGQTS----VGVDDLRRLCILR [267]
Dme_Medea   QSYYLDREAGRTPGDAVH-KIYPAACIKVFDLRQCHQQMHSLATNAQAGVDDLRRLCILR [276]
Tca_Smad4   QSYYLDREAGRQPGDAVH-KIYPSAYIKVFDLRQCHNQMTTQAATAQAGVDDLRRLCILR [278]
Hro_Smad4   QSYYLDREAGRAPGDAVH-KIYPNAYIKVFDLRQCYRQMQQQAATAQAGVDDLRRLCILR [277]
Bfl245341   QSYYLDREAGRAPGDAVH-KIYPSAYIKVFDLRQCHRQMQQQAATAQAGVDDLRRLCILR [278]
Mmu_SMAD4   QSYYLDREAGRAPGDAVH-KIYPSAYIKVFDLRQCHRQMQQQAATAQAGVDDLRRLCILR [278]
Aqu1.225807 QAPNANLRNRWES-ATVV-KVPQGCLLDLFNSQDFAKRLADAVHLGYEAVTQLQKQCTIR [275]
Aqu1.216777 QSKNLNYLNGFLL-TTVC-KFLPGCSSKIFNKEHFDTLLAQSINQGLDSIMNL------- [267]
Mle_Smad1a  QSRNSNKEYGFHP-STVV-KIQSGVKLKIFCHKLFHEILTQQLTEGYEAVFDLTKHCMIR [280]
Mle_Smad1b  QSRNCNRERGFHP-STVC-KLPPGYKLRIFNYSDFYRLLQDNVHNGFEAVYDLTKHCSIR [277]
Ta_Smad1    QSPNSNRRYGWHP-AAVC-KIPPGSSLRIFNSQEFANLLSQSVTQGYEAVYHLSHMCIIR [273]
Hro_Smad2_3 QSPNCNRRYGWHP-ATVV-KIPPGCNLKIFNNQEFAALLSQSVNQGFEAVYQLTKMCTIR [272]
Mle_Smad2   QSQNCNQRNGWHP-NTVC-KIPTGCHLNIFNNTEFANLLSQSVGHGFEAVYQLARMCTFR [272]
Dme_Smad2   QSPNCNQRYGWHP-ATVC-KIPPGCNLKIFNNQEFAALLSQSVSQGFEAVYQLTRMCTIR [277]
Nv1631657   QSPNCNQRYNWHP-ATVC-KIPPGCNLKIFNNQEFAQLLSQSVNQGFEAVYALTRMCTIR [273]
Spu_Smad2_3 QSPNCNQRYGWHP-ATVC-KIPPGCNLKIFNNQEFAAQLSQSVNRGFEAVYQLTRMCTIR [273]
Mmu_Smad3   QSPNCNQRYGWHP-ATVC-KIPPGCNLKIFNNQEFAALLAQSVNQGFEAVYQLTRMCTIR [273]
Mmu_Smad2   QSPNCNQRYGWHP-ATVC-KIPPGCNLKIFNNQEFAALLAQSVNQGFEAVYQLTRMCTIR [277]
Aqu1.228116 QSRNCNSSHGFHL-TTVC-KIPPGCSLKIFNNQDFASMLAQSVHQGFESVYELTKMCTIR [275]
Aqu1.229822 HSRNNNFSNGFHP-TTVC-KIPPGCSLRIFNNQDFASTLAESVTEGVETVYELTKMCTIK [275]
Ta_Smad2    QSRNCNYHHNFHP-TTVC-KIPSSCSLKIFDNQDFAALLSESVSKGFEAVYQLTKMCTIR [275]
Hvu_Smad1   QSKNCNYHHGFHP-STVC-KIPPQCTLKIFNNQEFAQLLSQSVNHGYEAVYELSKHCTIR [276]
Nve_Smad1_5 QSRNCNHSHGFHP-TTVC-KIPSGCTLKIFNNQEFAQLLSQSVNYGFEAVYELTKMCSIR [276]
Tca971286   QSRNCNHHHGFHP-STVC-KIPAGCSLRIFNNAEFAQLLSQCVNHGFEAVYELTKMCTIR [275]
Dme_Mad     QSRNCNYHHGFHP-STVC-KIPPGCSLKIFNNQEFAQLLSQSVNNGFEAVYELTKMCTIR [275]
Spu_Smad5   QSRNCNHRHGFHP-TTVC-KIPPGCSLKIFNNQEFAALLSQYVNHGFEMVYELTKMCTIR [275]
Bfl115184   QSRNCNHHHGFHP-TTVC-KIPPGCSLKIFNNQEFAQLLSQSVNHGFEAVYELTKMCTIR [276]
Mmu_Smad8   QSRNCNYQHGFHP-ATVC-KIPSGCSLKVFNNQLFAQLLAQSVHHGFEVVYELTKMCTIR [275]
Mmu_Smad1   QSRNCNYHHGFHP-TTVC-KIPSGCSLKIFNNQEFAQLLAQSVNHGFETVYELTKMCTIR [275]
Mmu_Smad5   QSRNCNFHHGFHP-TTVC-KIPSSCSLKIFNNQEFAQLLAQSVNHGFEAVYELTKMCTIR [275]
Mle_Smad6   QSPTMS--TGDKSRLQVH-KVLPGYALNSYHFAHHSTVSRTAR--------------TIR [234]
Tca_Smad6   NSVTLDSADSPLPT-----RVPAEQCLCVYDPQKAAAHRTCWDFSGPIDPN------SIR [245]
Ta_Smad6    NSPLYNKNIQSTHNTEVK-KVQPGYSLKVFNYARVDMPQQIRPYVGPRYPY------SIR [211]
Nve1631691  NGPYVTTTPSASQNITVT-KVPPGFSLKIYDYNH-----SPATCRTFEGPQSWKVPESVR [256]
Mmu_Smad7   KSATLDNPDSRT--LLVH-KVFPGFSIKAFDYEKAYSLQRPNDHEFMQQPWTGF---TVQ [267]
Sko_Smad6   NSPTLDTPNSRT--LSVW-KVSPGYSIRIFDYEKSELLRRTRNPELMDGPYDPN---SVR [262]

Mbre_MH2    LAFVR------TGEFDDKIPCWIRIRMGDALRMWETLTHSTQDH-------- [137]
Aqu1.204818 LSFTKGWGDGYSRKEVTSTPCWINMALCAPLKWLDQVLLALEPSDSVCGSNT [212]
Aqu1.211302 LSFVKGWGSNYKRQTIKETPCWIEVHFNHALQLLDSILIQLPSESEIQDFVK [205]
Mle_Smad4   LSFVKGWGPDYHRVNIKYTPCWIEIQLHRALQLLDHVLQWTQMYEAGQDH-- [328]
Aqu1.229767 LSFVKGWGSDYKRQTIKETPCWIEVHFNRALQLLDSVLTQLPSEFKIQDSVK [331]
Aqu1.215834 LSFVKGWGPDYRRQSIKETPCWVEIHLNRALQLLDSVLTQLPSESQIQDSVV [330]
Ta_Smad4    FSFVKGWGPDYPRKDIKQTPCWVEIHLHRALQLLDQVLQSIPSTNRMPPD-- [325]
Nve1623482  LSFVKGWGPDYPRKSIKETPCWIEIHLHRALQLLDEILITMPINEPRPHD-- [317]
Dme_Medea   LSFVKGWGPDYPRQSIKETPCWIEVHLHRALQLLDEVLHAMPIDGPRAAA-- [326]
Tca_Smad4   LSFVKGWGPDYPRQSIKETPCWVEIHLHRALQLLDEVLHTMPIDGPRGIE-- [328]
Hro_Smad4   MSFVKGWGPDYPRQNIKQTPCWIEIQLHRALQLLDEVLHTMPIAEPHPHD-- [327]
Bfl245341   MSFVKGWGPDYPRQSIKQTPCWIEIHLHRALQLLDEVLHTMPLTGGDPRHLD [330]
Mmu_SMAD4   MSFVKGWGPDYPRQSIKETPCWIEIHLHRALQLLDEVLHTMPIADPQPLD-- [328]
Aqu1.225807 MSFIKGWGADYRRSQITSTPCWIEVNIHGPMQWLDKVQTHMGGPNGIIHSDT [327]
Aqu1.216777 ---------------------------------------------------- [267]
Mle_Smad1a  MSFVKGWGADYHRQDVTSTPCWVEMSLNGPLQWVDKCLKYIGSSKNPISSVS [332]
Mle_Smad1b  LSFVKGWGAEYHRQDITSTPCWVEIHLNGPYMWLDDVLKQMGTPNDVISSVS [329]
Ta_Smad1    MSFVKGWGAQYKRQTVTSTPCWIEIRLNGPLHWLDKVLSQMDSPDRPISSQS [325]
Hro_Smad2_3 MSFVKGWGAEYRRQTVTSTPCWIELHLNGPLQWLDKVLTQMGSPRSPCSSMS [324]
Mle_Smad2   ISFVKRWGAEYSRQDVTSTPCWIEVKLNGPLQWLDKVLSQMGAPNLTCGSVS [324]
Dme_Smad2   MSFVKGWGAEYRRQTVTSTPCWIELHLNGPLQWLDRVLTQMGSPRLPCSSMS [329]
Nv1631657   MSFVKGWGAEYRRQTVTSTPCWIELHLNGPLQWLDKVLTQMGSPSAPCSSVS [325]
Spu_Smad2_3 MSFVKGWGAEYRRQTVTSTPCWIELHLNGPLQWLDRVLTQMVPPDKQCSSVS [325]
Mmu_Smad3   MSFVKGWGAEYRRQTVTSTPCWIELHLNGPLQWLDKVLTQMGSPSIRCSSVS [325]
Mmu_Smad2   MSFVKGWGAEYRRQTVTSTPCWIELHLNGPLQWLDKVLTQMGSPSVRCSSMS [329]
Aqu1.228116 LSFVKGWGAEYHRQDITSTPCWIEIHLHGPLMWLDKVLSQMGRPGGICDSNS [327]
Aqu1.229822 LSFVKGWGAEYNRHDITSTHCWIEIHLHGPLMWLDKVLSQMGRPDGICDSDS [327]
Ta_Smad2    ISFVKGWGAEYHRQDVTSTPCWIEIHLHGPLQWLDRVLIQMGSPRDPAGSVS [327]
Hvu_Smad1   MSFVKGWGAEYHRQGVTSTPCWIEIHLHGPLQWLDKVLTQMGSPQNAITSVS [328]
Nve_Smad1_5 ISFVKGWGAEYHRQDVTSTPCWIEVHLHGPLQWLDKVLSQMGSPRNPISSVS [328]
Tca971286   MSFVKGWGAEYHRQDVTSTPCWIEVHLNGPLQWLDKVLTQMGSPHNAISSVS [327]
Dme_Mad     MSFVKGWGAEYHRQDVTSTPCWIEIHLHGPLQWLDKVLTQMGSPHNAISSVS [327]
Spu_Smad5   MSFVKGWGAEYHRQDVTSTPCWIEIHLNGPLQWLDKVLTQMGSPHNPISSVS [327]
Bfl115184   MSFVKGWGAEYHRQDVTSTPCWIEIHLHGPLQWLDRVLTQMGSPHNPISSVS [328]
Mmu_Smad8   MSFVKGWGAEYHRQDVTSTPCWIEIHLHGPLQWLDKVLTQMGSPHNPISSVS [327]
Mmu_Smad1   MSFVKGWGAEYHRQDVTSTPCWIEIHLHGPLQWLDKVLTQMGSPHNPISSVS [327]
Mmu_Smad5   MSFVKGWGAEYHRQDVTSTPCWIEIHLHGPLQWLDKVLTQMGSPLNPISSVS [327]
Mle_Smad6   LSFEKGWGPGYRRQYITDAPCWLELLLSIR---------------------- [264]
Tca_Smad6   ISFAKGWGPLYKRQEITSCPCWLEILLAPCSDDDDHKAEFFNLLKERCCAVS [297]
Ta_Smad6    ISFVKGWGRNYTRQFITSCPCWLEILLNVSH--------------------- [242]
Nve1631691  ISFAKGWGASYRRPVVTSCPCWLEIHFTVSR--------------------- [287]
Mmu_Smad7   ISFVKGWGQCYTRQFISSCPCWLEVIFNSR---------------------- [297]
Sko_Smad6   ISFVKGWGPCYSRQFVTSCPCWIEIIFNLPR--------------------- [293]

;
END;
set nowarnings=yes autoclose=yes;
	log start filename=Smad4.log;
	lset  rates=gamma ngammacat = 4;
	prset Aamodelpr=mixed;
	mcmcp ngen=5000000 printfreq=1000 samplefreq=100 nchains=4 savebrlens=yes nruns=1 filename=Smad4
	mcmc;
